# Supplementary material
Source: Research Square preprint supplement (doi:10.21203/rs.3.rs-8757702/v1)
Supplement: Supplementary file 1 [file 70657d5df2068e3c9399b5e8.docx]

**SUPPLEMENTARY INFORMATION**

**d)**

**c)**

**b)**

**a)**


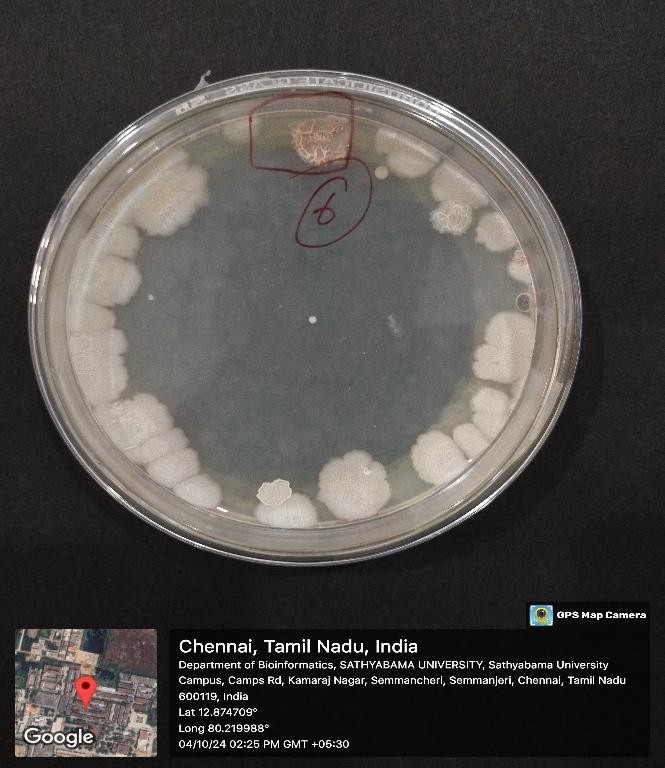

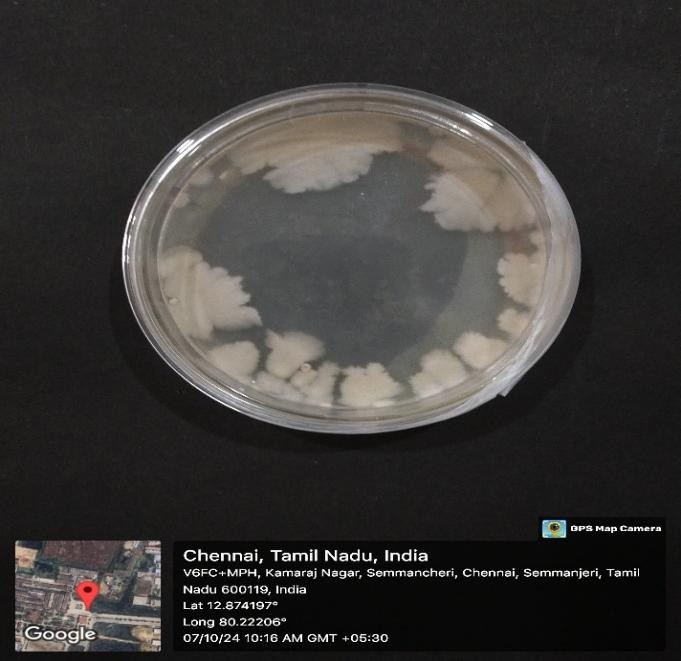

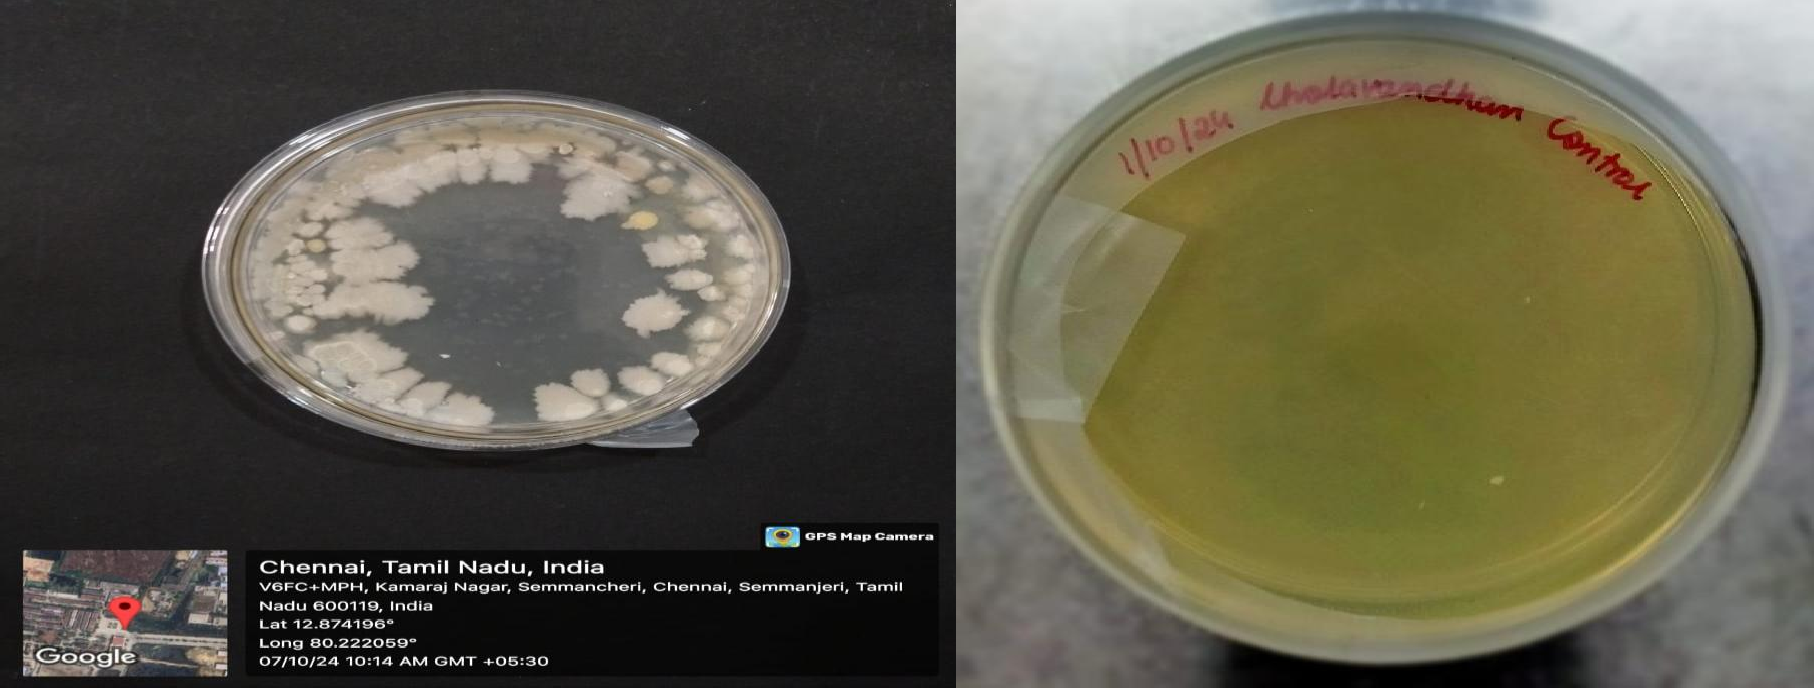

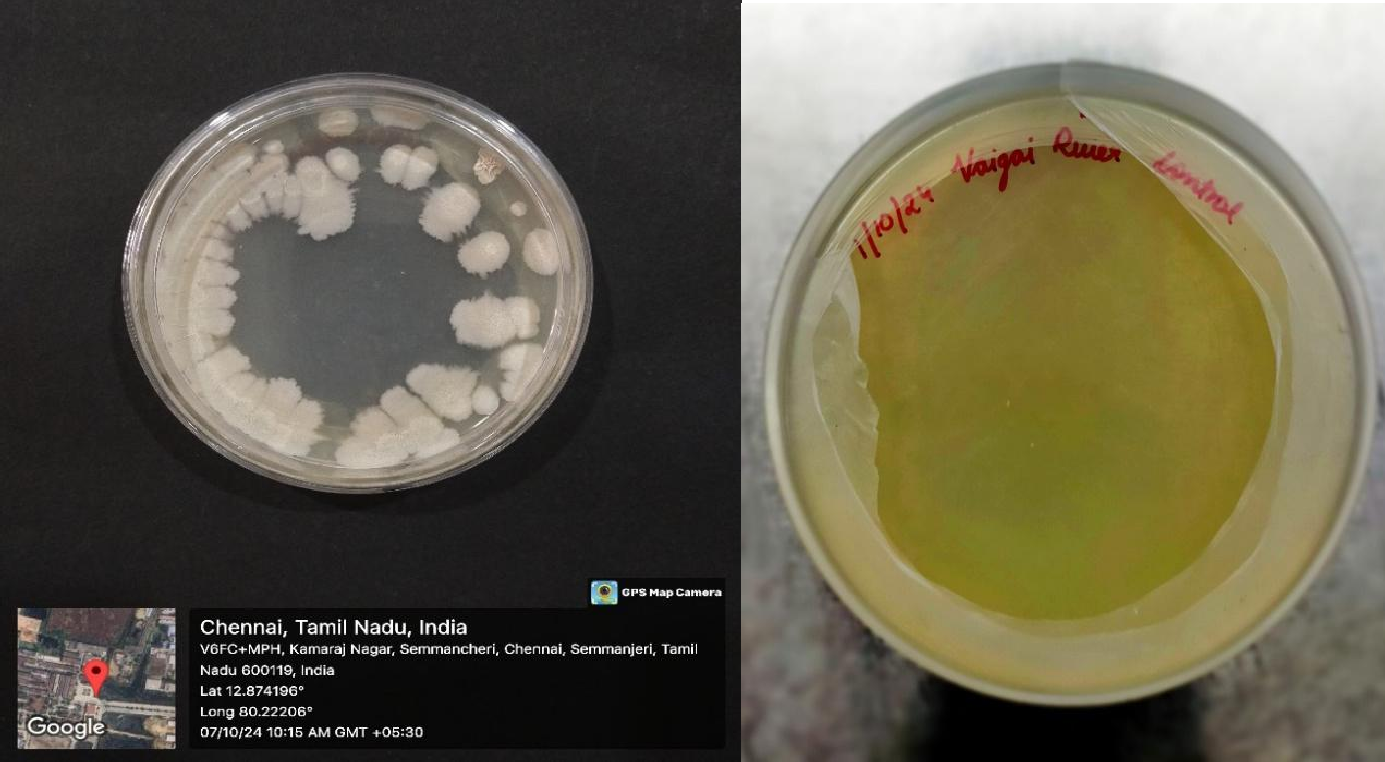


**Fig. S1** Bacterial colonies isolated from four different water samples using the spread plate method a) Mudalaikulam b) Mudalaikulam 2 c) Vaigai River d) Sholavandhan


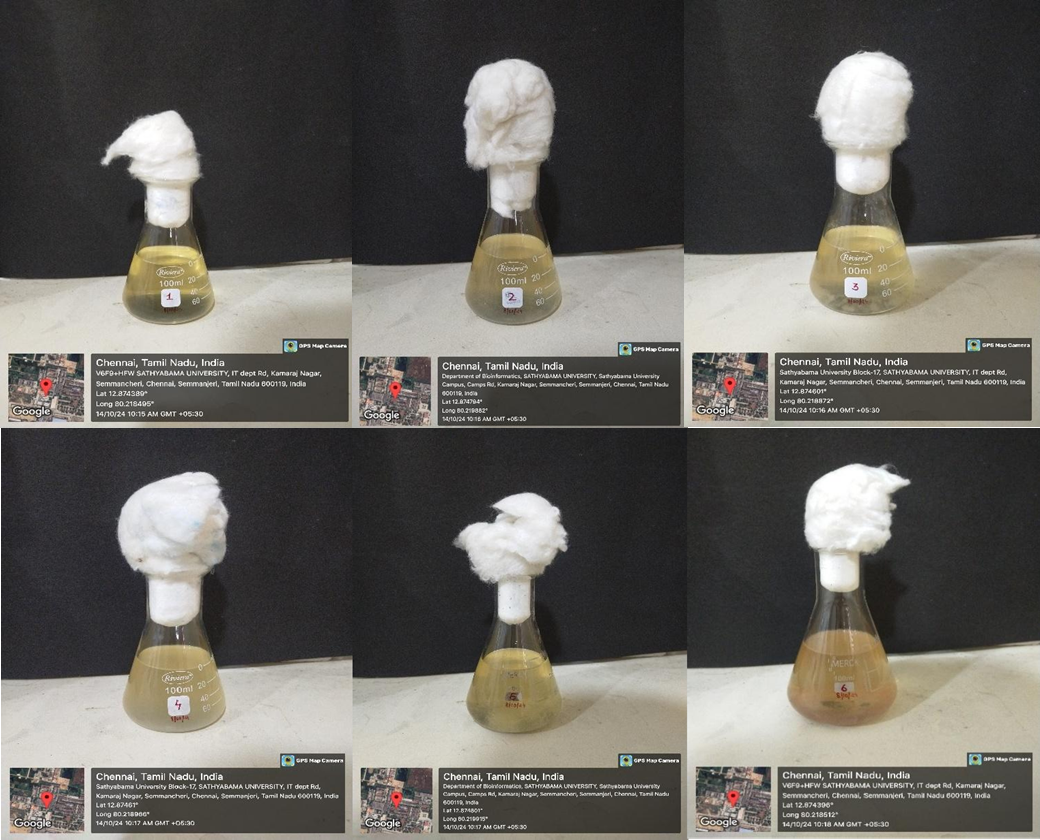


f)

e)

d)

c)

b)

a)

**Fig.S2** Nutrient Broth cultures of streak-isolated bacterial colonies: (a) Streak 1, (b) Streak 2, (c) Streak 3, (d) Streak 4, (e) Streak 5, and (f) Streak 6


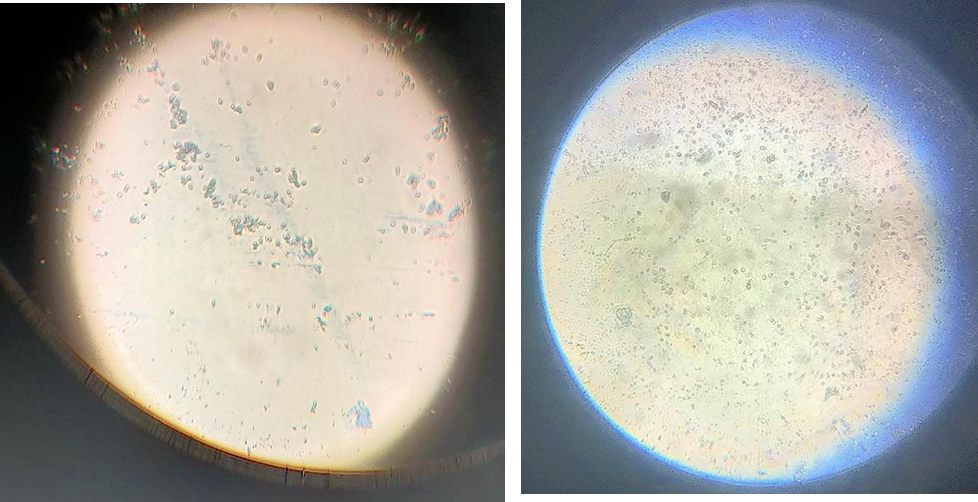


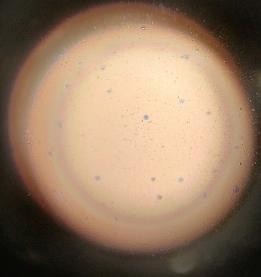

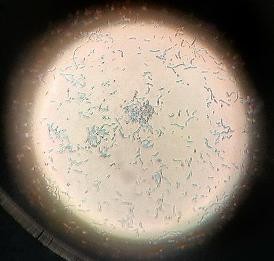
a) b)

**f)**

**e)**

**c)**

**b)**

**a)**


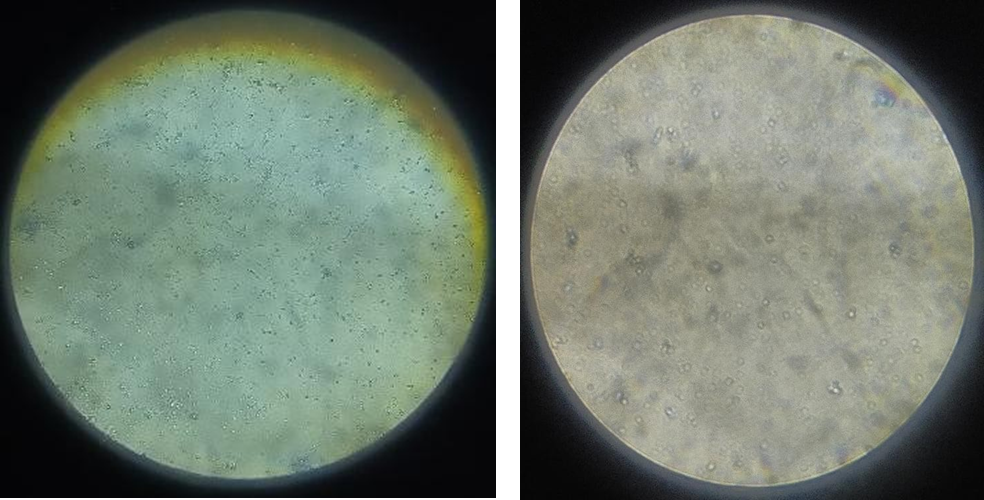
c) d)

e) f)

**Fig.S3** Simple Staining of streak isolates a) Streak 1 b) Streak 2 c) Streak 3 d) Streak 4 e) Streak 5 f) Streak 6

**
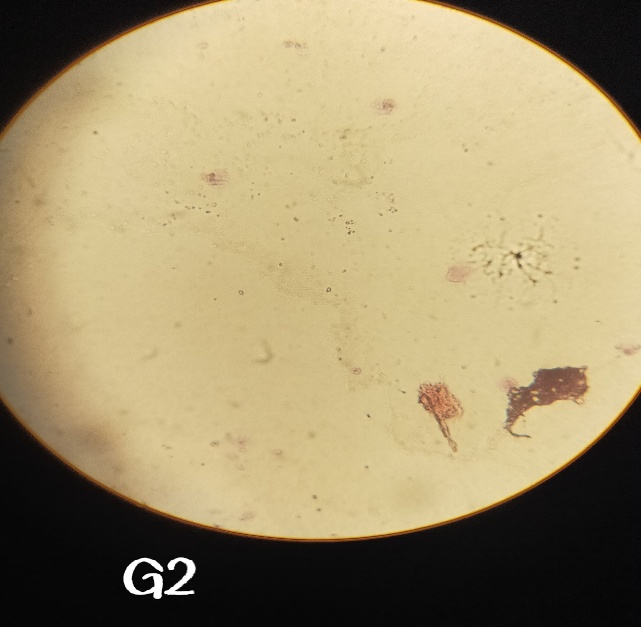

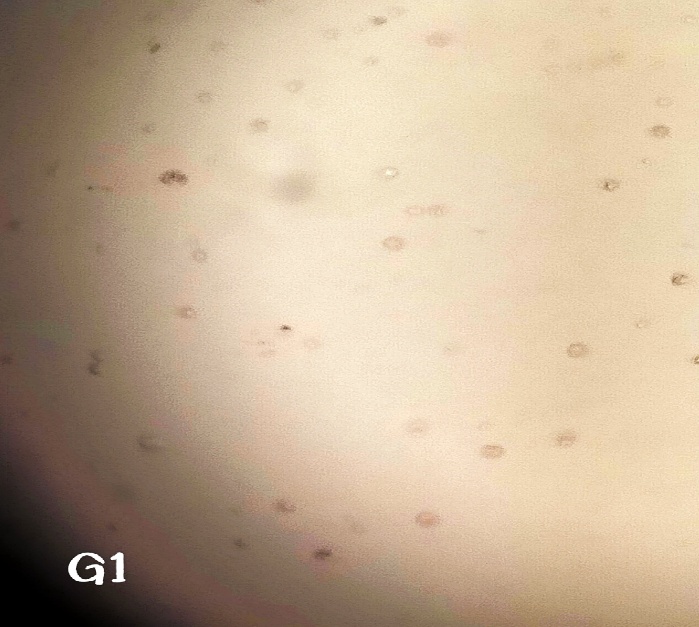
**


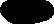

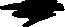


a) b)

**
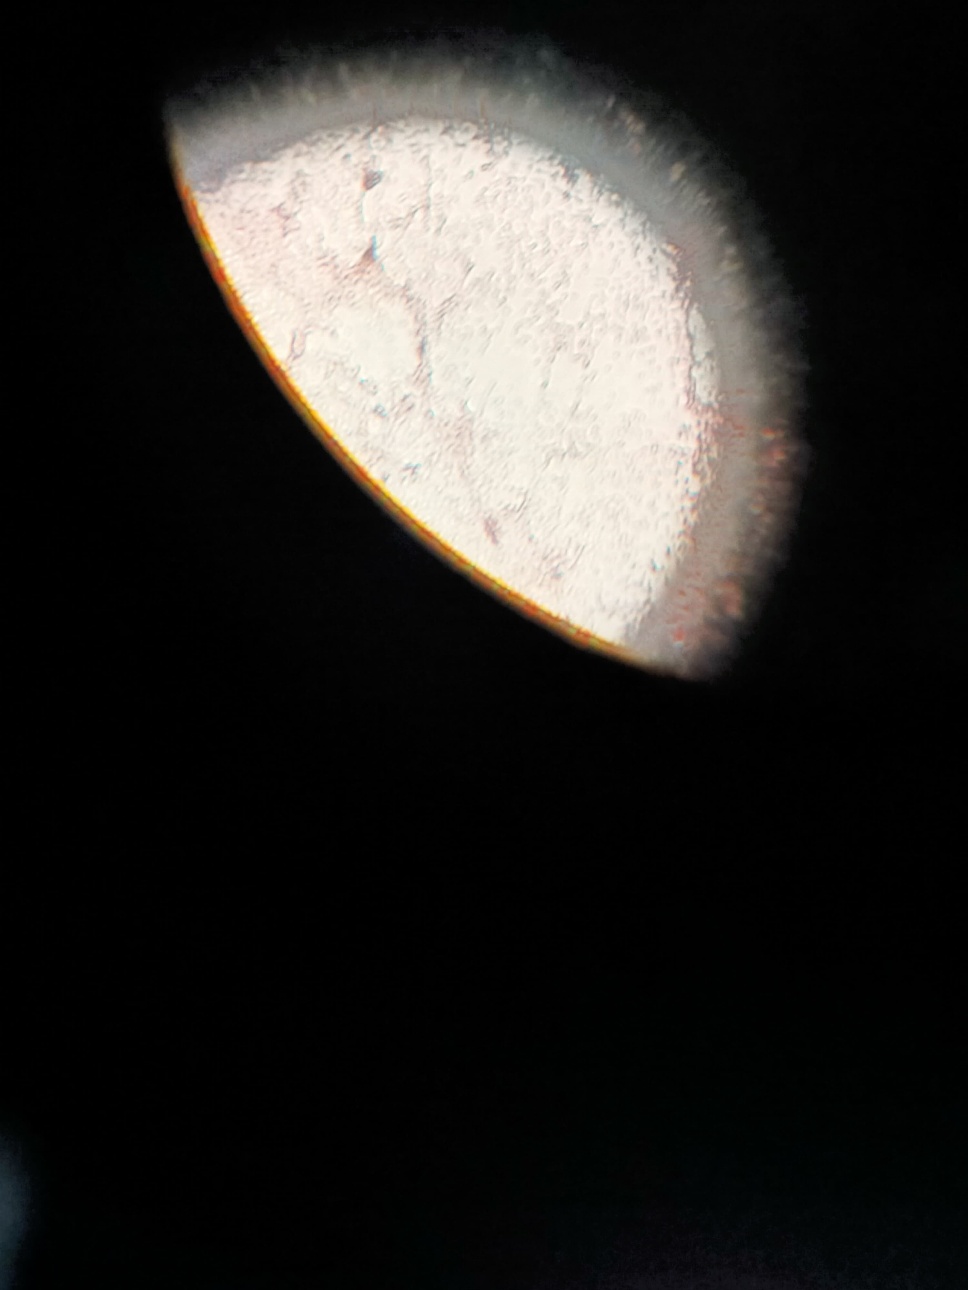

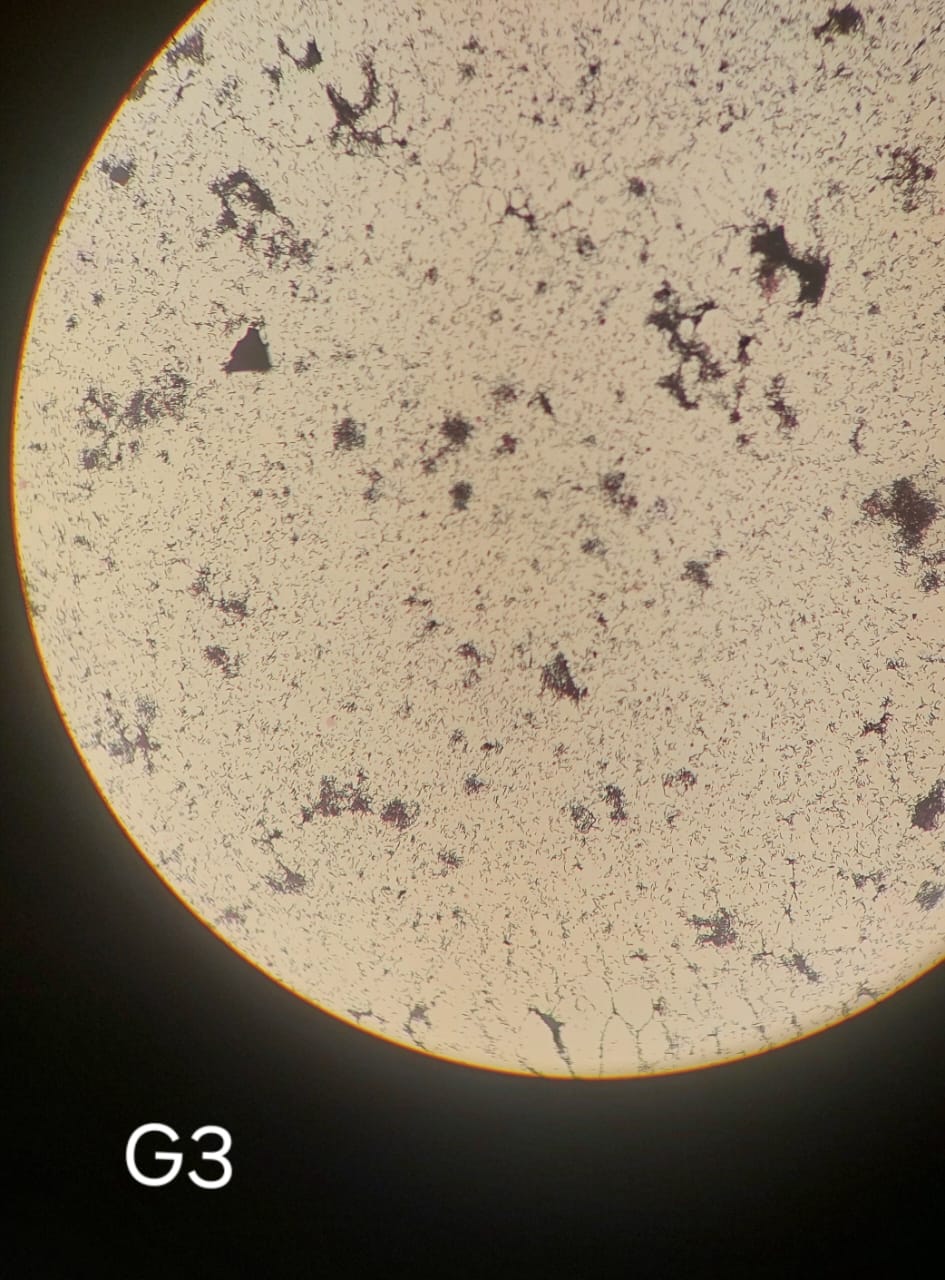
**


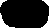


c) d)

**
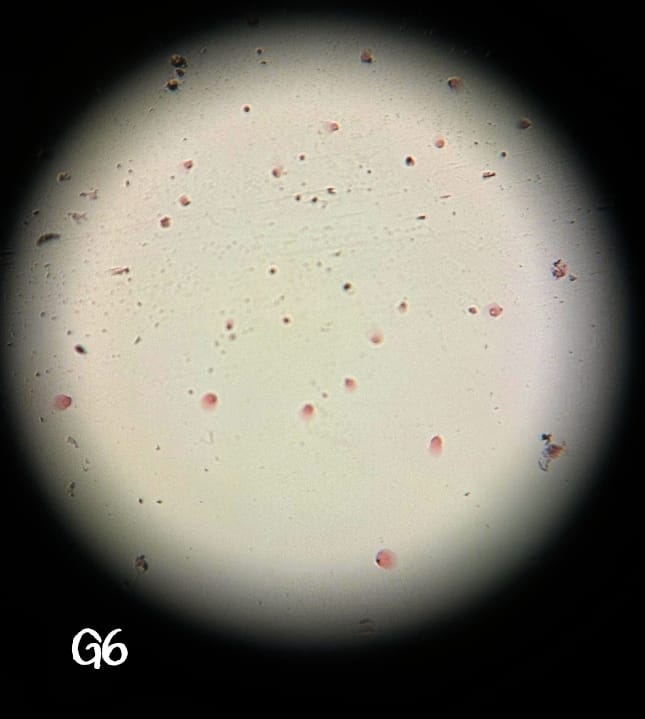

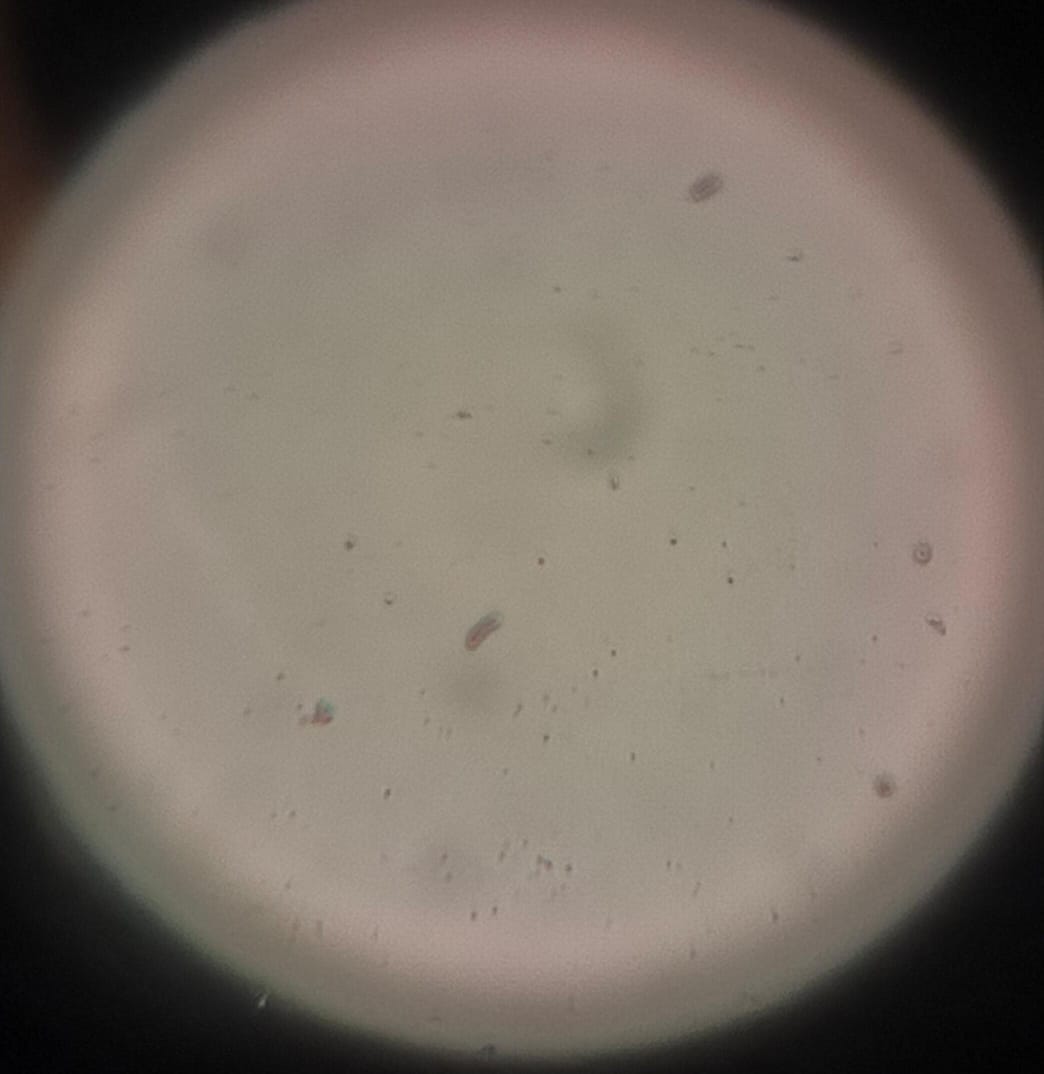
**


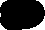


e) f)

**Fig.S4** Gram Staining of streak isolates a) Streak 1 b) Streak 2 c) Streak 3 d) Streak 4 e) Streak 5 f) Streak 6


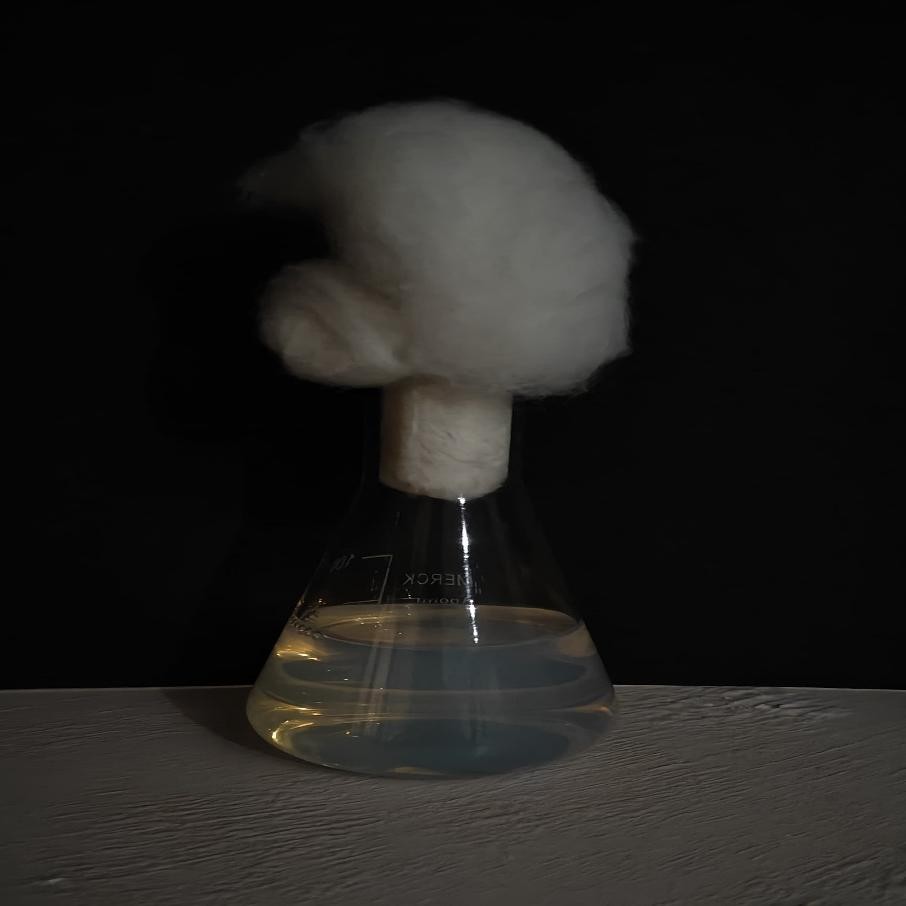


**Fig.S5** Unpurified Silver Nanoparticles solution


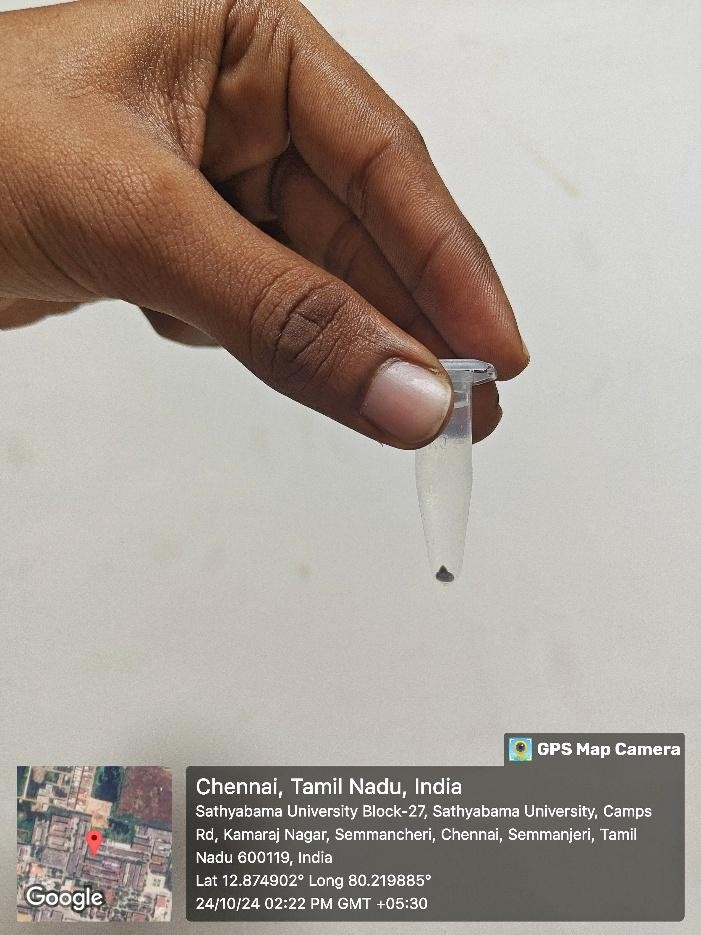


**Fig.S6** Purified Silver Nanoparticles
